# Supplementary material
Source: ML conference proceedings conference paper supplement (https://www.ecva.net/papers/eccv_2020/papers_ECCV/html/123560154_ECCV_2020_paper.php)
Supplement: Supplementary file 2 [file 123560154-supp.zip]

Archive with 3 entries (3 files):
- README.txt
- supplementary.pdf
- video.mp4
