# Supplementary material
Source: ML conference proceedings conference paper supplement (https://www.ecva.net/papers/eccv_2020/papers_ECCV/html/123560154_ECCV_2020_paper.php)
Supplement: Supplementary file 2 [file 123560154-supp.zip › README.txt]

Video file: video.mp4
Codec: H. 264
URL: http://www.h264encoder.com/
